# Supplementary material for: Catalytic growth of highly crystalline polyaniline by copper under ambient conditions
Source: Royal Society of Chemistry journal article supplement (doi:10.1039/c8ce00893k), 2018-01-01
Supplement: c8ce00893k1.pdf [file c8ce00893k1.pdf]

## Supporting Information Available:

### Growth of Crystalline Polyaniline by Copper Catalyzed C-N Coupling at Ambient Conditions

Junning Gao<sup>a,b,c\*</sup>, Jinbo Huang<sup>c</sup>, Zhaoming Huang<sup>c</sup>, Qinggang Meng<sup>c</sup>, Lijun Zheng<sup>c</sup>, Qian Sun<sup>d</sup>,  
Guoqiang Li<sup>a,b,c\*</sup>

#### Characterization equipment and setup

The morphology of the product was investigated with a NOVA NANOSEM 430 field emission scanning electron microscopy (SEM), the accelerating voltages applied were 5 and 10 kV. The Fourier infrared spectroscopy (FT-IR) was performed with Bruker Optik Vector 33-MIR, and Raman spectroscopy with HJY LabRAM Aramis using 532 nm laser. X-ray diffraction (XRD) was performed with a PANalytical X'Pert Pro at  $\theta/2\theta$  mode using Cu K $\alpha$  as X-ray source, the step was set at 0.033° and the delay time was 10 s. The chemical states of copper were analyzed with Kratos Axis Ultra DLD X-ray photoelectron spectroscopy (XPS) using Al K $\alpha$  photons with the pass energy of 40 eV. Pyrolysis-gas chromatography mass spectrometer (Py-GCMS) was performed with Shimadzu GCMS-QP2010plus to investigate the configuration of the polymer chains. Gel permeation chromatography (GPC) was performed with Waters 1515 to analyze the molecular weight and distribution. Both the Py-GCMS and GPC results were presented in supporting information with detailed measurement conditions. A Shimadzu GCMS-QP 2010 plus instrument was used to analyze the structure of the polymer chain. Separation was carried out using a RxiTM-5ms quartz column (30m $\times$ 0.25 $\mu$ m). Helium was used as carrier gas. The column flow was 1.0 mL/min and the purge flow was 3.0 mL/min in split mode. The initial oven temperature was set at 50 °C and then ramped up to 250 °C at a rate of 10°C/min and 2 min hold time. The temperatures of the injection, ion source and interface were 280 °C, 230 °C and 280 °C, respectively. Ion masses were scanned from 33 to 700 m/z at 1428 scans per second. A waters 1515 GPC instrument was used to analyze the molecular weight and distribution of the as-obtained product. The GPC columns (7.8 mm $\times$ 300 mm length) were Waters Styragel@HR 2, 4 and 6. DMF was used as solvent and the flow rate was 1 ml/min. The temperature of the column was 60 °C and that of the detector was 40°C. The molecular weight was calculated based on internal standard method using polymethyl methacrylate as calibration material.

#### Pyrolysis gas chromatography -mass spectrometer (Py-GCMS) analysis of the as-obtained product

As shown in Fig. S1, a majority of aniline with a small quantity of benzene were identified from the fragments of the product, indicating the monomer of the polymer chain being aniline.

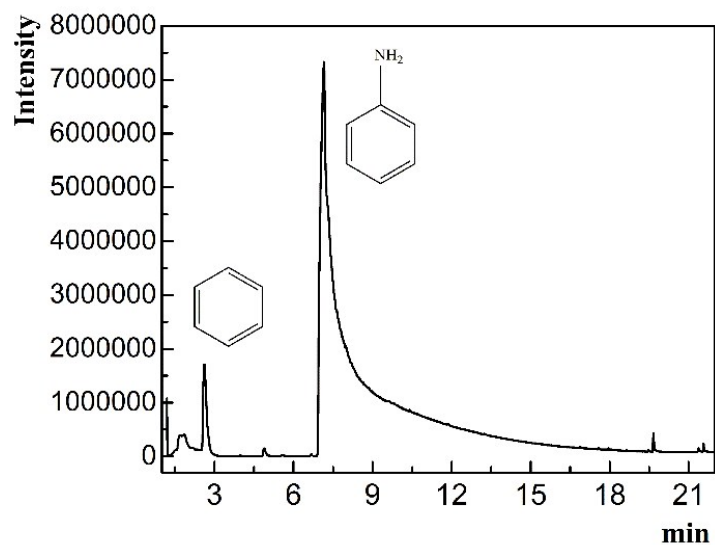

Fig. S1 Py-GCMS spectrum obtained at a retention time of 2 min.

#### Gel permeation chromatography (GPC) analysis of the as-obtained product

The calculated molecular weight was 2100, which corresponding to a polymerization of 210 for polyaniline. The weight distribution is narrow as shown by Fig. S2.

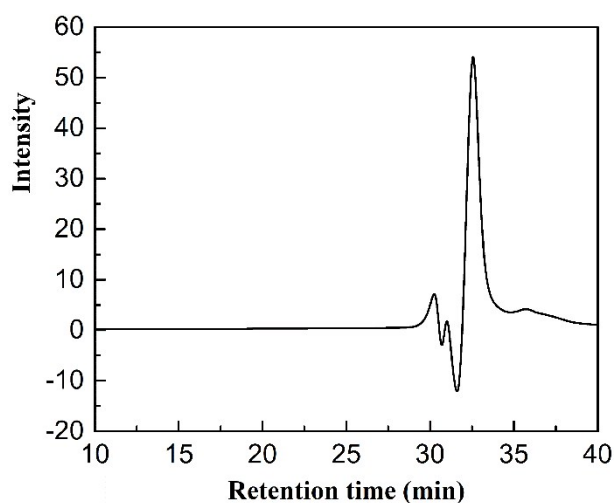

Fig. S2 GPC spectrum of the as-obtained polyaniline sample.

#### Indexing of the as-obtained polyaniline

The  $d$  spacing values were calculated from the diffraction peaks shown in Fig. 3 according to Bragg's law  $\lambda = 2d\sin\theta$ , where  $\lambda = 1.5418\text{\AA}$ . The lattice planes were determined based on the calculation by PowderCell 2.4 software.

Tab.S1  $d$  spacing, intensity and (hkl) indexing calculated from the XRD pattern shown in Fig.3 for the as-obtained polyaniline.

| $2\theta /^\circ$ | $d$ spacing / $\text{\AA}$ | Intensity/% | Lattice plane |
|-------------------|----------------------------|-------------|---------------|
|-------------------|----------------------------|-------------|---------------|

|       |       |       |            |
|-------|-------|-------|------------|
| 7.63  | 11.59 | 100   | (001)      |
| 14.49 | 6.11  | 3.03  | (011)      |
| 15.25 | 5.81  | 4.64  | (002)      |
| 15.85 | 5.59  | 20.40 | (110)      |
| 19.94 | 4.45  | 12.39 | (200)      |
| 21.00 | 4.23  | 3.92  | (201)      |
| 21.82 | 4.07  | 11.86 | (112)      |
| 22.71 | 3.92  | 8.80  | (003)      |
| 22.84 | 3.89  | 10.35 | (210)      |
| 24.46 | 3.64  | 13.57 | (211)(020) |
| 24.86 | 3.58  | 30.58 | (103)(202) |
| 26.51 | 3.36  | 8.19  | (120)      |
| 27.46 | 3.25  | 4.28  | (121)      |
| 28.09 | 3.18  | 4.45  | (113)(212) |
| 30.24 | 2.96  | 9.71  | (004)(122) |
| 33.3  | 2.69  | 3.39  | (311)      |
| 34.43 | 2.60  | 2.63  | (114)      |
| 35.12 | 2.56  | 3.99  | (123)      |
| 35.58 | 2.52  | 3.35  | (312)      |
| 36.47 | 2.46  | 3.67  | (204)      |

---
